# Supplementary material for: Quantifying Stochastic Noise in Cultured Circadian Reporter Cells
Source: PubMed Central journal article supplement (PMC4654518; doi:10.1371/journal.pcbi.1004451), 2015-11-20
Supplement: pcbi.1004451.s009.pdf [file pcbi.1004451.s009.pdf]

**Table S1: A model of the mammalian core circadian feedback loop, from Hirota *et al.*, 2012.** Lower case letters (p: *Per*, c1: *Cry1*, c2: *Cry2*) are mRNA state variables. Uppercase letters (P: PER, C1: CRY1, C2: CRY2) are the free (cytosolic) proteins. C1N: CRY1 and C2N: CRY2 are the nuclear proteins.

$$\frac{dp}{dt} = \frac{v_{\text{txn,p}}}{k_{\text{txn,p}} + (\text{C1N} + \text{C2N})^3} - \frac{v_{\text{deg,p}} \mathbf{p}}{k_{\text{deg,p}} + \mathbf{p}} \quad (1)$$

$$\frac{dc1}{dt} = \frac{v_{\text{txn,c1}}}{k_{\text{txn,c}} + (\text{C1N} + \text{C2N})^3} - \frac{v_{\text{deg,c1}} \mathbf{c1}}{k_{\text{deg,c}} + \mathbf{c1}} \quad (2)$$

$$\frac{dc2}{dt} = \frac{v_{\text{txn,c2}}}{k_{\text{txn,c}} + (\text{C1N} + \text{C2N})^3} - \frac{v_{\text{deg,c2}} \mathbf{c2}}{k_{\text{deg,c}} + \mathbf{c2}} \quad (3)$$

$$\begin{aligned} \frac{d\mathbf{P}}{dt} = & k_{\text{tln,p}} \mathbf{p} - \frac{v_{\text{deg,P}} \mathbf{P}}{k_{\text{deg,P}} + \mathbf{P}} - v_{\text{a,CP}} \mathbf{P} \mathbf{C1} + v_{\text{d,CP}} \mathbf{C1N} \\ & - v_{\text{a,CP}} \mathbf{P} \mathbf{C2} + v_{\text{d,CP}} \mathbf{C2N} \end{aligned} \quad (4)$$

$$\frac{d\mathbf{C1}}{dt} = \mathbf{c1} - \frac{v_{\text{deg,C1}} \mathbf{C1}}{k_{\text{deg,C}} + \mathbf{C1}} - v_{\text{a,CP}} \mathbf{P} \mathbf{C1} + v_{\text{d,CP}} \mathbf{C1N} \quad (5)$$

$$\frac{d\mathbf{C2}}{dt} = \mathbf{c2} - \frac{v_{\text{deg,C2}} \mathbf{C2}}{k_{\text{deg,C}} + \mathbf{C2}} - v_{\text{a,CP}} \mathbf{P} \mathbf{C2} + v_{\text{d,CP}} \mathbf{C2N} \quad (6)$$

$$\frac{d\mathbf{C1N}}{dt} = -\frac{v_{\text{deg,CP}} \mathbf{C1N}}{k_{\text{deg,CP}} + \mathbf{C1N} + \mathbf{C2N}} + v_{\text{a,CP}} \mathbf{P} \mathbf{C1} - v_{\text{d,CP}} \mathbf{C1N} \quad (7)$$

$$\frac{d\mathbf{C2N}}{dt} = -\frac{(v_{\text{deg,CP}} m_{\text{C2N}}) \mathbf{C2N}}{k_{\text{deg,CP}} + \mathbf{C2N} + \mathbf{C1N}} + v_{\text{a,CP}} \mathbf{P} \mathbf{C2} - v_{\text{d,CP}} \mathbf{C2N} \quad (8)$$
