# Supplementary material for: Quantifying Stochastic Noise in Cultured Circadian Reporter Cells
Source: PubMed Central journal article supplement (PMC4654518; doi:10.1371/journal.pcbi.1004451), 2015-11-20
Supplement: pcbi.1004451.s010.pdf [file pcbi.1004451.s010.pdf]

**Table S2: Parameter values for the model in Table S1.** Nominal values for the kinetic parameters are shown below, as published in Hirota *et al.*, 2012 [15].

|    | Parameter                | Description                        | Value |
|----|--------------------------|------------------------------------|-------|
| 1  | $v_{\text{txn,p}}$       | <i>Per</i> Transcription rate      | 0.195 |
| 2  | $v_{\text{txn,c1}}$      | <i>Cry1</i> Transcription rate     | 0.131 |
| 3  | $v_{\text{txn,c2}}$      | <i>Cry1</i> Transcription rate     | 0.114 |
| 4  | $k_{\text{txn,p}}$       | <i>Per</i> Repression constant     | 0.425 |
| 5  | $k_{\text{txn,c}}$       | <i>Cry1/2</i> Repression constant  | 0.259 |
| 6  | $v_{\text{deg,p}}$       | <i>Per</i> Max degradation rate    | 0.326 |
| 7  | $v_{\text{deg,c1}}$      | <i>Cry1</i> Max degradation rate   | 0.676 |
| 8  | $v_{\text{deg,c2}}$      | <i>Cry2</i> Max degradation rate   | 0.608 |
| 9  | $k_{\text{deg,p}}$       | <i>Per</i> Degradation constant    | 0.011 |
| 10 | $k_{\text{deg,c}}$       | <i>Cry1/2</i> Degradation constant | 1.149 |
| 11 | $v_{\text{deg,P}}$       | Max PERc degradation rate          | 2.970 |
| 12 | $k_{\text{deg,P}}$       | PERc degradation constant          | 0.034 |
| 13 | $v_{\text{deg,C1}}$      | Max CRY1c degradation rate         | 1.523 |
| 14 | $v_{\text{deg,C2}}$      | Max CRY2c degradation rate         | 1.686 |
| 15 | $k_{\text{deg,C}}$       | CRYc degradation constant          | 2.017 |
| 16 | $v_{\text{deg,CP}}$      | CRYn degradation rate              | 0.101 |
| 17 | $m_{\text{C2N}}$         | CRY2n degradation multiplier       | 3.318 |
| 18 | $k_{\text{deg,CP}}$      | CRYn degradation constant          | 0.053 |
| 19 | $v_{\text{a,CP}}$        | CRYn association rate              | 0.041 |
| 20 | $v_{\text{d,CP}}$        | CRYn dissociation rate             | 0.002 |
| 21 | $k_{\text{tl},\text{p}}$ | PER translation rate               | 3.000 |
