# Supplementary material for: Quantifying Stochastic Noise in Cultured Circadian Reporter Cells
Source: PubMed Central journal article supplement (PMC4654518; doi:10.1371/journal.pcbi.1004451), 2015-11-20
Supplement: pcbi.1004451.s011.pdf [file pcbi.1004451.s011.pdf]

**Table S3: Simple model of transcription-translation oscillations with intrinsic and extrinsic noise.** A model with both intrinsic and extrinsic noise, developed to examine the effect of each noise source on population-level amplitudes. Intrinsic noise is generated by simulating the solution stochastically using GillesPy. Extrinsic noise is generated by varying the free-running period,  $t_c$ . Equations adapted from [26].

$$\frac{dX}{dt} = t_c \left( \frac{1}{1+Y} - X \right)$$

$$\frac{dY}{dt} = t_c \left( k_t X - k_d Y - \frac{Y}{\alpha_0 + \alpha_1 Y + \alpha_2 Y^2} \right)$$

| Parameter  | Value    |
|------------|----------|
| $k_t$      | 20       |
| $k_d$      | 1        |
| $P$        | 4 (or 2) |
| $\alpha_0$ | 0.005    |
| $\alpha_1$ | 0.05     |
| $\alpha_2$ | 0.1      |
| $t_c$      | 3.516    |
